# Supplementary material
Source: PubMed Central journal article supplement (PMC3719680)
Supplement: MCB.00417-13_zmb999100049so1.pdf [file MCB.00417-13_zmb999100049so1.pdf]

Supplementary Figure S1. Johnson et al

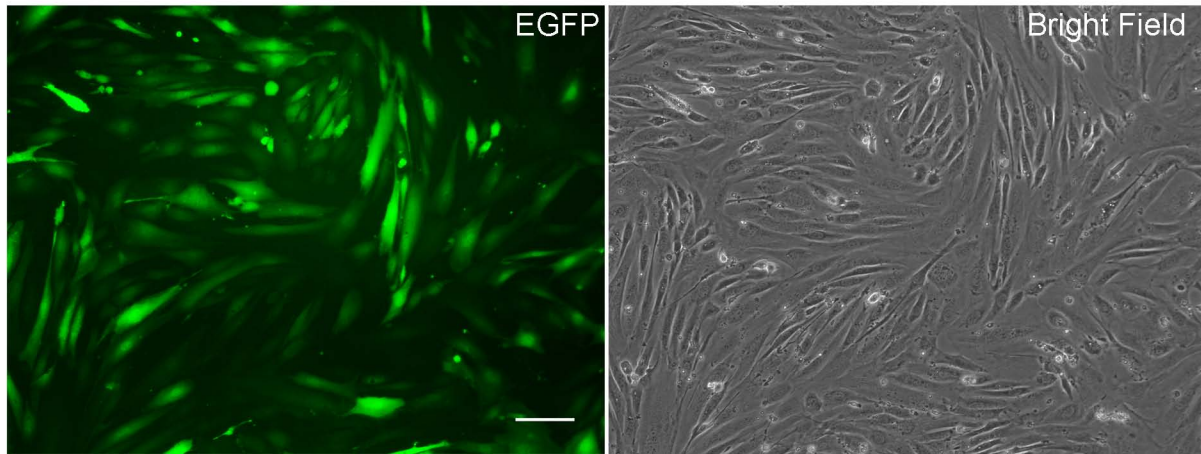

Johnson et al, Supplementary data, Figure S2

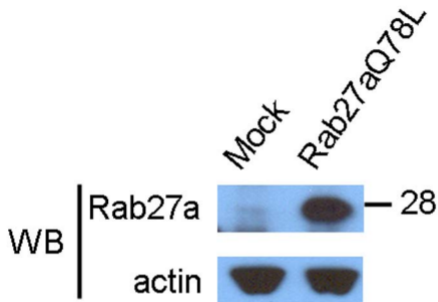

Supplementary Figure S3. Johnson et al

Calnexin / Megallin

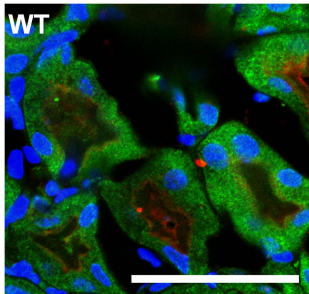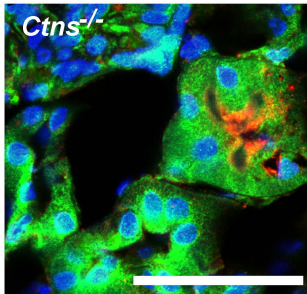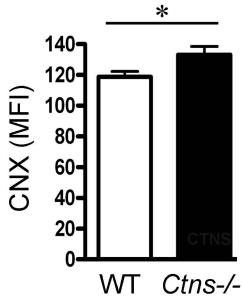

## SUPPLEMENTARY DATA

### Movie 1. *Lysosomal trafficking in wild type fibroblast*

Cells were labeled with the lysosomal probe LysoTracker and analyzed by TIRFM as described under “Materials and Methods”. Movies were continuously recorded for 120 s and are shown at 7fps.

### Movie 2. *Lysosomal trafficking in cystinotic fibroblast*

Cells were labeled with the lysosomal probe LysoTracker and analyzed by TIRFM as described under “Materials and Methods”. Movies were continuously recorded for 120 s and are shown at 7fps.

### Movie 3. *Lysosomal trafficking in cystinotic fibroblast expressing a constitutively active form of Rab27a*

Cells were labeled with the lysosomal probe LysoTracker and analyzed by TIRFM as described under “Materials and Methods”. Movies were continuously recorded for 120 s and are shown at 7fps.

### Movie 4. *Lysosomal trafficking in cystinotic fibroblast expressing a constitutively active form of Rab7*

Cells were labeled with the lysosomal probe LysoTracker and analyzed by TIRFM as described under “Materials and Methods”. Movies were continuously recorded for 120 s and are shown at 7fps.

### Supplementary Figure S1

Murine fibroblasts transduction using the lentiviral expression system

Representative image of *Ctns*<sup>-/-</sup> murine fibroblast transduced with the p-LV-EGFP-expression vector.

Scale bar= 10  $\mu$ m.

### Supplementary Figure S2

*Expression of Rab27aQ78L relative to endogenous Rab27a in cystinotic fibroblast*

Western blot analysis of cystinotic fibroblast showing Rab27a expression levels in Rab27aQ78L-infected or mock infected cells.

### Supplementary Figure S3

*Immunofluorescence analysis of the expression of endogenous calnexin (CNX) in PTCs from wild type and cystinotic mice.*

Immunofluorescence analysis of calnexin was performed as described under “Materials and Methods”. Scale bar = 50  $\mu$ m. For quantification of the mean fluorescence intensity (MFI) of endogenous calnexin, four to six proximal tubules from at least 5 different areas from 3 independent wild type (WT) or *Ctns*<sup>-/-</sup> mice were analyzed. A total of 69 and 58 proximal tubules from wild type and *Ctns*<sup>-/-</sup> kidneys, respectively, were included in the analysis. Mean  $\pm$  SEM, \*,  $p < 0.05$ .
